# Supplementary material
Source: PubMed Central journal article supplement (PMC11134819)
Supplement: NIHPP2024.01.27.577546v2-supplement-1.pdf [file NIHPP2024.01.27.577546v2-supplement-1.pdf]

## 10 Supplementary material

### 10.1 Aggression scores

| Uncontrolled Trajectory Approximations |       |       |       |       |       |       |       |       |       |       |       |       |       |       |       |         |
|----------------------------------------|-------|-------|-------|-------|-------|-------|-------|-------|-------|-------|-------|-------|-------|-------|-------|---------|
|                                        | N.I.  | KRAS  | TP53  | CycD  | SMAD  | T-K   | C-K   | S-K   | T-C   | T-S   | C-S   | T-C-K | T-S-K | C-S-K | T-C-S | T-C-S-K |
| Aut <sub>c</sub>                       | 0.509 | 0.531 | 0.964 | 0.818 | 0.528 | 0.974 | 0.827 | 0.356 | 0.953 | 0.955 | 0.817 | 0.97  | 0.967 | 0.82  | 0.962 | 0.961   |
| Apo <sub>c</sub>                       | 0.359 | 0.356 | 0.021 | 0.109 | 0.343 | 0.011 | 0.118 | 0.479 | 0.025 | 0.035 | 0.105 | 0.018 | 0.013 | 0.1   | 0.028 | 0.017   |
| Pro <sub>c</sub>                       | 0.213 | 0.209 | 0.56  | 0.017 | 0.211 | 0.555 | 0.013 | 0.24  | 0.018 | 0.92  | 0.012 | 0.015 | 0.944 | 0.018 | 0.01  | 0.014   |

Table 1: *Expression Approximations*. This table records the approximate phenotype expressions for the PCC in Figure 10. Given 1,000 random initial states, these results show trajectory approximations after 300 time steps (i.e. function updates) with 1% noise.

We derived aggressiveness scores for each mutation combination using long-term trajectory approximations. Simulations were run using 1000 random initializations, 300 time steps, and 1% noise to achieve an approximate probability of phenotype expression. In Table, 1, we see that the non-induced (N.I.) system showed levels of 51% autophagy, 36% apoptosis, and 21% proliferation. The heat maps in Figure 3 are sorted with column-wise mutation groups and used to compare cancer cell autophagy and proliferation while giving a negative weight ( $\omega = -1$ ) to apoptosis. The row label “Same” indicates that the same weight was given to both autophagy and proliferation (used value  $\omega = 2$  for both), “High/Low” indicates a high weight for autophagy ( $\omega = 10$ ) but a low weight for proliferation ( $\omega = 2$ ), and “Low/High” indicates a low weight for autophagy ( $\omega = 2$ ) but a high weight for proliferation ( $\omega = 10$ ). Thus, scores were calculated using:

$$\text{Score} = \text{Aut}_c \times \omega_1 + \text{Pro}_c \times \omega_2 + \text{Apop}_c \times (-1) \quad \text{where} \quad \omega_{1,2} \in \{2, 10\}$$

Scaling of the heat map ranges orange (low score) to red (high score) based on the maximum and minimum values in each table. However, blue shading (i.e. cold) indicates a negative score, which is interpreted as successful depletion of aggression. See [23] sections 2.3 and 4.4 for more details.

Lastly, we justify the positive weight given to autophagy, which is a natural process where cells heal themselves. The cell will break down any damaged or unnecessary components, and it will reallocate the nutrients from these processes to those that are essential. However, studies have shown that autophagy is required for pancreatic tumor growth [39]. Autophagy can help tumors overcome conditions such as hypoxia and nutrient deprivation. Within tumors, cells can exist under hypoxic conditions. If activated autophagy is then suppressed by deletion of Beclin 1, studies have shown increased cell death. It has also been observed that autophagy is increased in KRAS mutated cells, and aids in survival of the cancer cells while experiencing nutrient starvation. Further, animal studies have shown that autophagy contributes to tumor-cell survival by enhancing stress tolerance and supplying nutrients to meet the metabolic demands of tumors. Once suppression of autophagy occurred, there was an observance of tumor-cell death [40].

Note: our aggression scores are based on combinations autophagy, apoptosis, and proliferation, merely one method among many for estimating aggression. Moreover, the attractor analysis (see [11, 23] indicated that certain mutation combinations yield a large basin for attractors with both autophagy and proliferation expression. It is likely that modular structure alone is not enough to determine aggression and target cardinality. Rather, it should be used alongside other analyses.

## 10. 2 Boolean pancreatic cancer model and functions

|                                 |                                                                                      |
|---------------------------------|--------------------------------------------------------------------------------------|
| <b>Cytokines</b>                | <b>(Cyan)</b>                                                                        |
| VEGF                            | NF $\kappa$ Bs   STATp   NF $\kappa$ Bp                                              |
| EGF                             | cJUNp                                                                                |
| bFGF                            | ERKs   ERKp                                                                          |
| TNF $\alpha$                    | TNF $\alpha$                                                                         |
| PDGFBB                          | SMADs   SMADp                                                                        |
| Thiazolidinedione               | Thiazolidinedione                                                                    |
| TGF $\beta$ 1                   | SMADs   SMADp                                                                        |
| IFN $\gamma$                    | IFN $\gamma$                                                                         |
| <b>Pancreatic Stellate Cell</b> | <b>(Green)</b>                                                                       |
| VEGFRs                          | VEGF                                                                                 |
| EGFRs                           | EGF                                                                                  |
| FGFRs                           | bFGF                                                                                 |
| TNFRs                           | TNF $\alpha$                                                                         |
| PDGFBBRs                        | PDGFBB                                                                               |
| PPAR $\gamma$ s                 | Thiazolidinedione                                                                    |
| TGFRs                           | TGF $\beta$ 1                                                                        |
| IFNGRs                          | IFN $\gamma$                                                                         |
| RASs                            | (( VEGFRs )   ( EGFRs )   ( FGFRs ) )                                                |
| PIK3s                           | (( PDGFBBRs )   ( RASs ) )                                                           |
| SMADs                           | TGFRs                                                                                |
| STATs                           | IFNGRs                                                                               |
| RAFs                            | RASs                                                                                 |
| NF $\kappa$ Bs                  | (( TNFRs )   ( AKTs ) )                                                              |
| P38s                            | (( MEKs )   ( P53s ) )                                                               |
| MEKs                            | RAFs                                                                                 |
| PIP3s                           | ( $\sim$ PTENs ) & ( PIK3s )                                                         |
| P53s                            | ( $\sim$ MDM2s ) & ( P38s )                                                          |
| PTENs                           | P53s                                                                                 |
| AKTs                            | PIP3s                                                                                |
| ERKs                            | ( PDGFBBRs )   ( MEKs )                                                              |
| AP1s                            | ERKs                                                                                 |
| P21s                            | P53s                                                                                 |
| MDM2s                           | (( AKTs )   ( P53s ) )                                                               |
| Apos                            | P53s                                                                                 |
| Pros                            | ( $\sim$ P21s ) & ( AP1s )                                                           |
| Migs                            | ( AKTs ) & ( AP1s ) & ( Acts )                                                       |
| Acts                            | SMADs & (( $\sim$ STATs )   ( $\sim$ PPAR $\gamma$ s ) ) & ( NF $\kappa$ Bs   AP1s ) |
| <b>Pancreatic Cancer Cell</b>   | <b>(Purple)</b>                                                                      |
| EGFRc                           | EGF   HER2c                                                                          |
| FGFRc                           | bFGF                                                                                 |
| TGFRc                           | TGF $\beta$ 1                                                                        |
| HER2c                           | HER2c                                                                                |
| JAK1c                           | HER2c                                                                                |

|          |                                                              |
|----------|--------------------------------------------------------------|
| PIK3c    | ( EGFRc )   ( RASc )                                         |
| RASc     | ( EGFRc )   ( FGFRc )                                        |
| SMADc    | TGFRc                                                        |
| STATc    | JAK1c                                                        |
| PIP3c    | ( ~ PTENc ) & ( PIK3c )                                      |
| RAFc     | RASc                                                         |
| P21c     | ( ~ STATc ) & ( ( SMADc )   ( P53c ) )                       |
| MEKc     | RAFc                                                         |
| NFκBc    | AKTc                                                         |
| AKTc     | PIP3c                                                        |
| PTENc    | P53c                                                         |
| ERKc     | MEKc                                                         |
| E2Fc     | ( ~ RBc )                                                    |
| cJUNc    | ( ERKc )   ( JNKc )                                          |
| CyclinDc | ( ~ P21c ) & ( NFκBc )                                       |
| RBc      | ( ~ CyclinDc )                                               |
| BCLXLc   | ( ~ P53c ) & ( ( NFκBc )   ( STATc )   ( AKTc )   ( JNKc ) ) |
| JNKc     | MEKc                                                         |
| mTORc    | ( ~ cJUNc ) & ( AKTc )                                       |
| BAXc     | ( ~ BCLXLc )                                                 |
| Beclin1c | ( ~ BCLXLc ) & ( ~ CASPc )                                   |
| MDM2c    | ( ~ E2Fc ) & ( AKTc   P53c )                                 |
| P53c     | ( ~ MDM2c )                                                  |
| CyclinEc | ( ~ P21c ) & ( E2Fc )                                        |
| CASPc    | ( ~ NFκBc ) & ( ( P53c )   ( Beclin1c )   ( BAXc ) )         |
| Autc     | ( ~ mTORc ) & ( ( NFκBc )   ( Beclin1c ) )                   |
| Apoc     | CASPc                                                        |
| Proc     | ( CyclinEc ) & ( ( JNKc )   ( cJUNc ) )                      |

Table 2: *Boolean functions for the whole pancreatic cancer model.* Each function indicates the next state of the node in terms of the current states of said nodes' regulators. Activation is written as OR statements, while suppression is written as AND NOT. The exception to this rule is PCC proliferation, because of its upstream signaling.

|                        |                                                                                               |
|------------------------|-----------------------------------------------------------------------------------------------|
| <b>Cytokines</b>       | <b>(Cyan)</b>                                                                                 |
| TNF $\alpha$           | TNF $\alpha$                                                                                  |
| Thiazolidinedione      | Thiazolidinedione                                                                             |
| TGF $\beta$ 1          | TGF $\beta$ 1                                                                                 |
| IFN $\gamma$           | IFN $\gamma$                                                                                  |
| <b>Stellate Cell</b>   | <b>(Green)</b>                                                                                |
| RASs                   | (( NF $\kappa$ Bs )   ( STATp )   ( PIP3p )   ( RASp )   ( ERKs ) )                           |
| NF $\kappa$ Bs         | (( TNF $\alpha$ )   ( PIP3s ) )                                                               |
| PIP3s                  | ( ~ P53s ) & ( ( TGF $\beta$ 1 )   ( RASs ) )                                                 |
| P53s                   | ( ~ PIP3s ) & ( ~ P53s ) & ( RASs )                                                           |
| ERKs                   | ( TGF $\beta$ 1 )   ( RASs )                                                                  |
| Pros                   | ( ~ P53s ) & ( ERKs )                                                                         |
| Migs                   | ( PIP3s ) & ( ERKs ) & ( Acts )                                                               |
| Acts                   | ( TGF $\beta$ 1 ) & ( ( ~ IFN $\gamma$ )   ( ~ Thiaz. ) ) & ( ( NF $\kappa$ Bs )   ( ERKs ) ) |
| <b>Pancreatic Cell</b> | <b>(Purple)</b>                                                                               |
| HER2p                  | HER2p                                                                                         |
| RASp                   | ( RASp )   ( HER2p )   ( ERKs )                                                               |
| STATp                  | HER2p                                                                                         |
| PIP3p                  | ( ~ P53p ) & ( ( RASp )   ( HER2p ) )                                                         |
| P21p                   | ( ~ STATp ) & ( ( TGF $\beta$ 1 )   ( P53p ) )                                                |
| BCLXLp                 | ( ~ P53p ) & ( ( PIP3p )   ( STATp )   ( RASp ) )                                             |
| P53p                   | ~ ( ( ( P21p )   ( ~ PIP3p ) ) & ( ( PIP3p )   ( P53p ) ) )                                   |
| CASPp                  | ( ~ PIP3p ) & ( ( P53p )   ( ~ BCLXLp ) )                                                     |
| Autp                   | (( RASp )   ( ~ PIP3p ) ) & ( ( PIP3p )   ( ( ~ BCLXLp ) & ( ~ CASPp ) ) )                    |
| Prop                   | ( ~ P21p ) & ( PIP3p ) & ( RASp )                                                             |

Table 3: *Boolean functions for the reduced pancreatic cancer model.* Each function indicates the next state of the node in terms of the current states of said nodes' regulators. Activation is written as OR statements, while suppression is written as AND NOT. Functions maintain the rules from the whole model by substituting values from the deleted nodes.

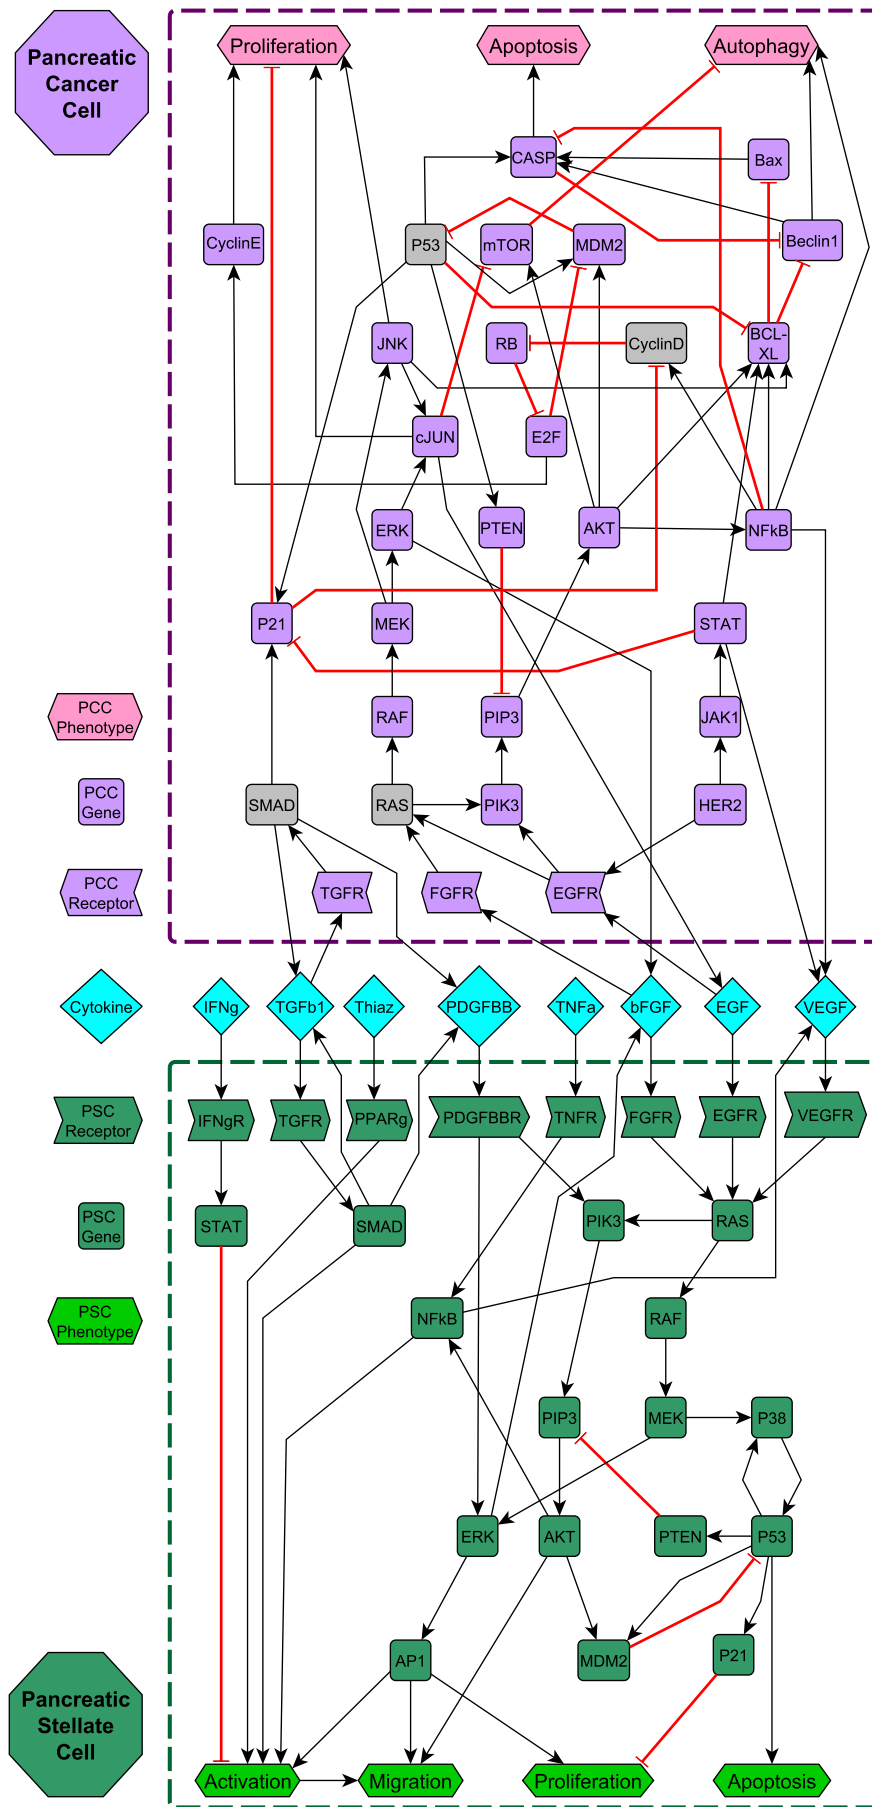

Figure 10:  
*Gene regulatory network model of pancreatic cancer.*

Shapes and colors of nodes indicate their function and cell type (respectively), as shown in the legend. Black barbed arrows indicate signal expression, while red bar arrows indicate suppression. Grey nodes located in the PCC indicate prevalent mutant genes [11, 29].

### 10.3 Tables and Graphs

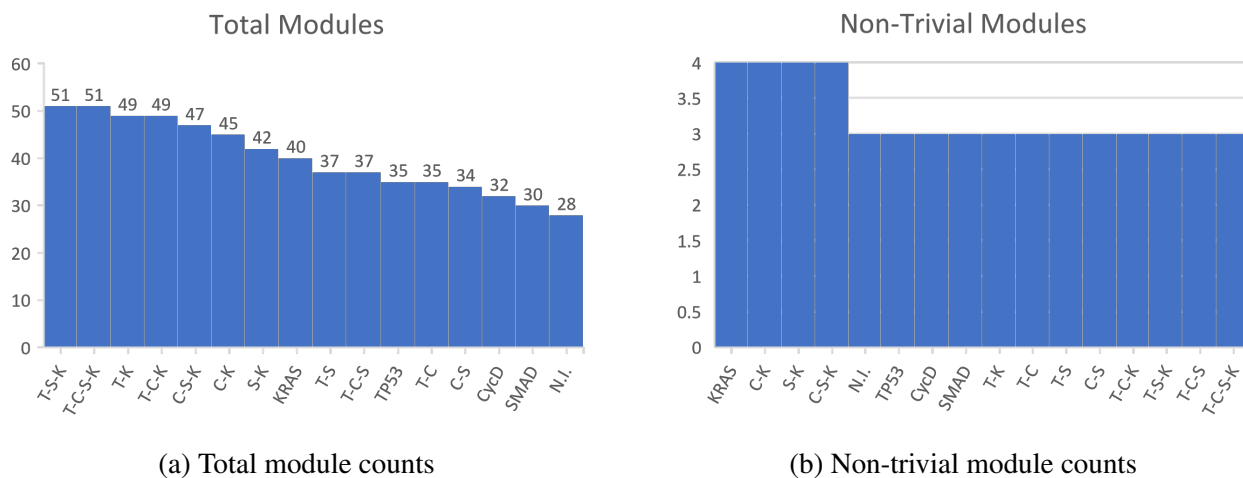

Figure 11: *Module counts*

Figure 12: *PC condensation graphs*. Included are all condensation graphs for each mutation combination. These are directed, acyclic graphs that are topologically sorted, and whose nodes represent the strongly connected components of Figure 10. Colors of nodes are based on the components they represent, and node numbers correspond to bin numbers (see supplementary materials through Section 7).

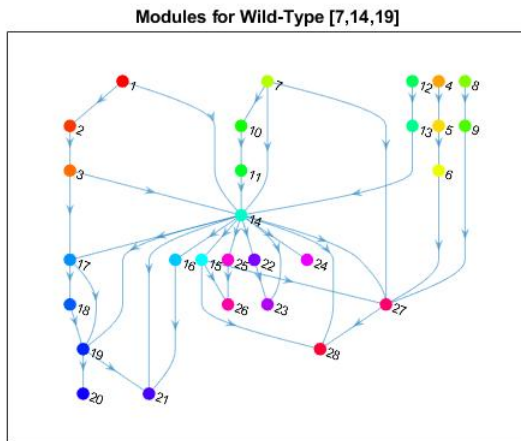

(a) Wild-type condensation graph.

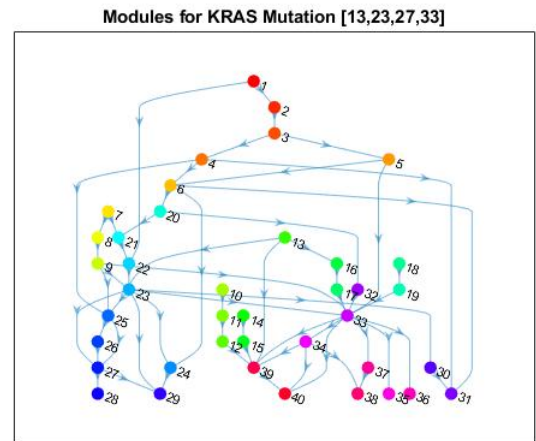

(b) KRAS condensation graph.

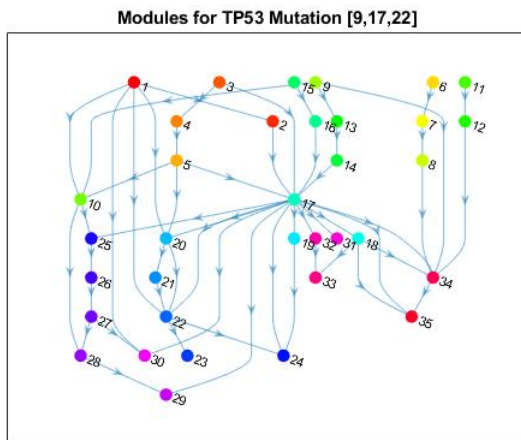

(c) TP53 condensation graph.

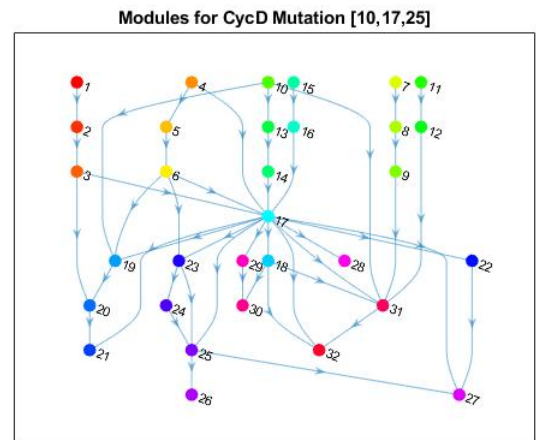

(d) CyclinD condensation graph.



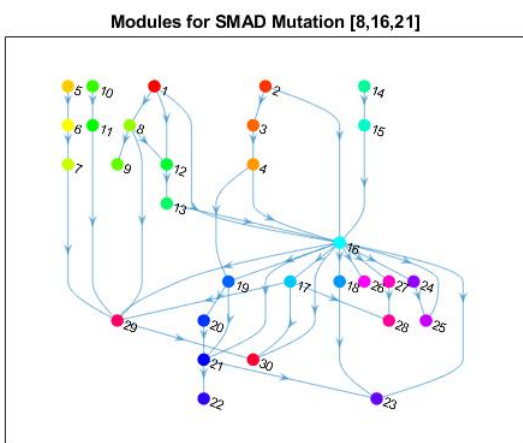

(e) SMAD condensation graph.

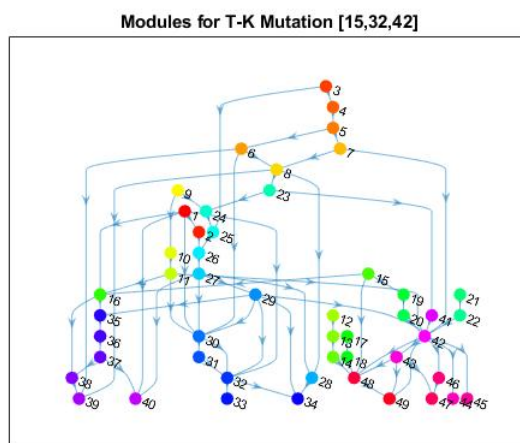

(f) T/K condensation graph.

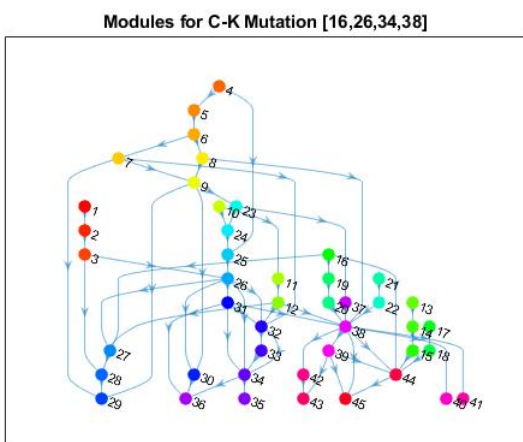

(g) C/K condensation graph.

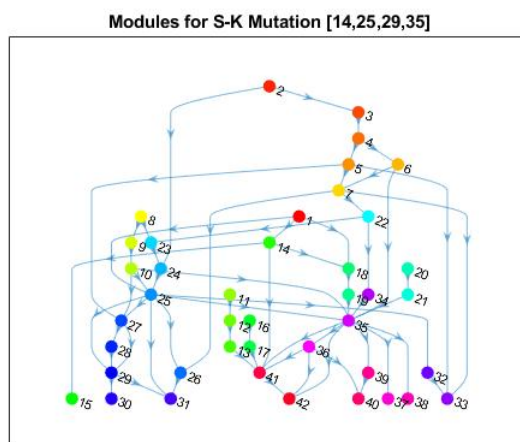

(h) S/K condensation graph.

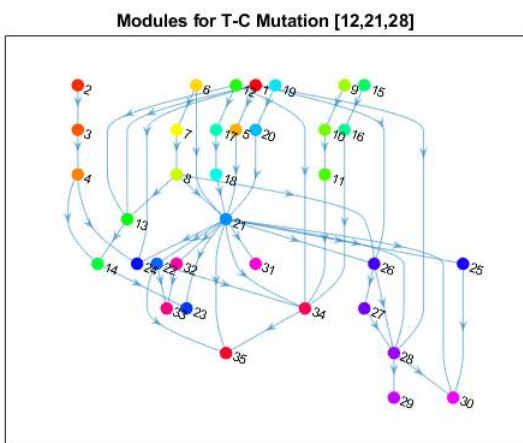

(i) T/C condensation graph.

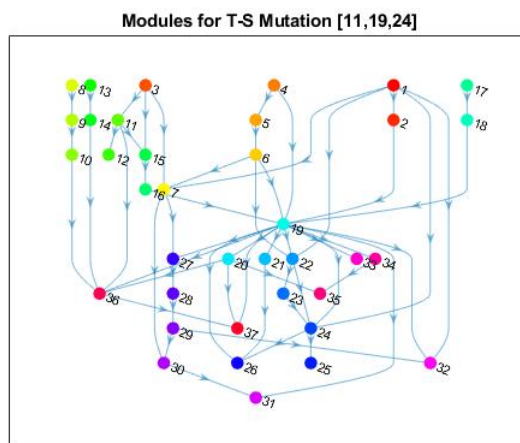

(j) T/S condensation graph.



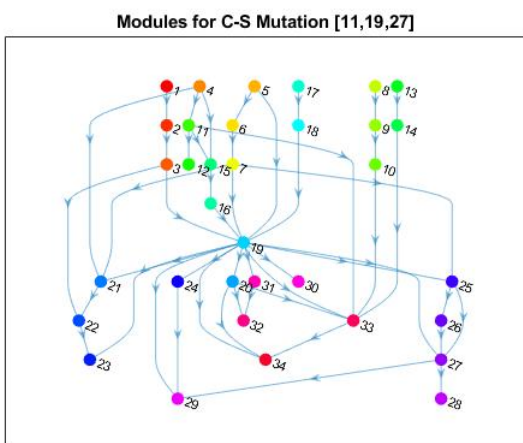

(k) C/S condensation graph.

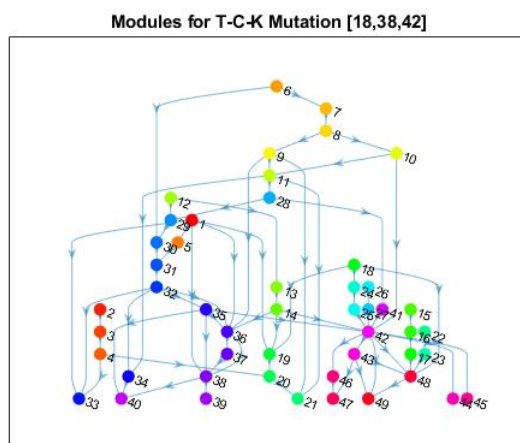

(l) T/C/K condensation graph.

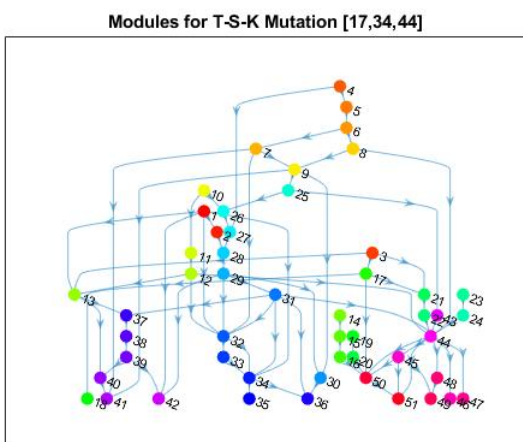

(m) T/S/K condensation graph.

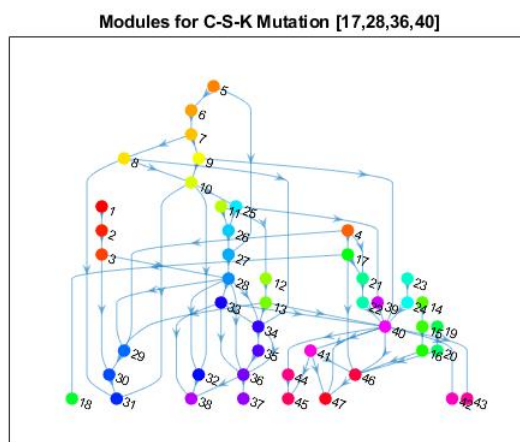

(n) C/S/K condensation graph.

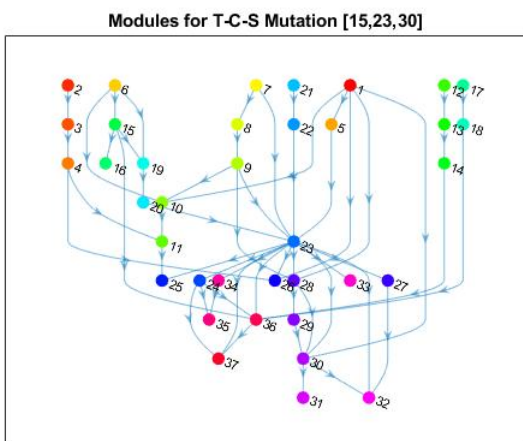

(o) T/C/S condensation graph.

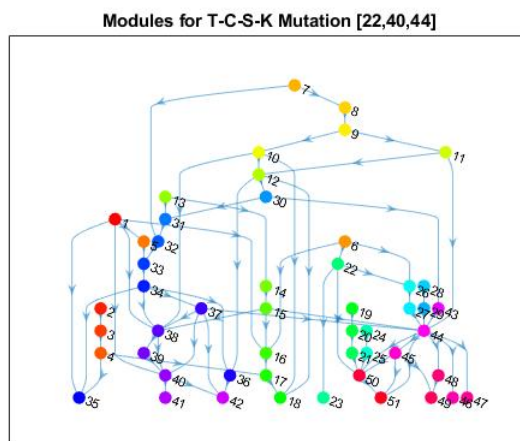

(p) T/C/S/K condensation graph.

# Total Modules

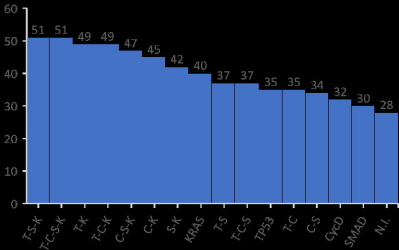

# Non-Trivial Modules

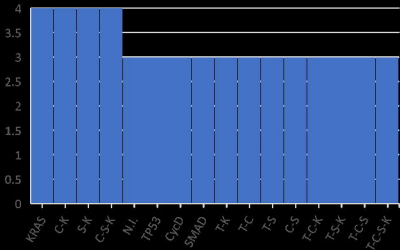

# Normalized Aggression Scores and Toposort Gaps Between Modules 2 and 3

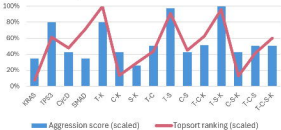

# Topological Module Rankings

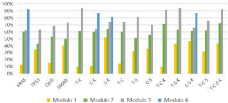

## Network Analysis

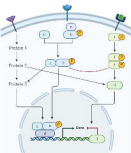

## Determine Modules

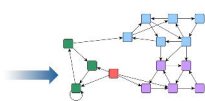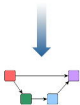

## Rank Modules

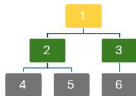

## Comparative Analysis

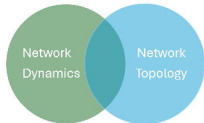

# Errors of Normalized Toposort Gap Rankings

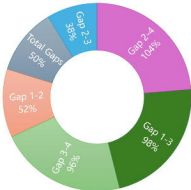



## Uncontrolled Phenotype Aggression Scores

|      |      |       |      |      |       |      |      |      |       |      |      |       |      |      |      |
|------|------|-------|------|------|-------|------|------|------|-------|------|------|-------|------|------|------|
| 1.09 | 1.12 | 3.03  | 1.56 | 1.14 | 3.05  | 1.56 | 0.71 | 1.92 | 3.72  | 1.55 | 1.95 | 3.81  | 1.58 | 1.92 | 1.93 |
| 5.16 | 5.37 | 10.74 | 8.11 | 5.36 | 10.84 | 8.18 | 3.56 | 9.54 | 11.36 | 8.09 | 9.71 | 11.55 | 8.14 | 9.61 | 9.62 |
| 2.79 | 2.80 | 7.51  | 1.70 | 2.82 | 7.49  | 1.67 | 2.63 | 2.06 | 11.08 | 1.65 | 2.07 | 11.36 | 1.72 | 2.00 | 2.05 |
| 3.01 | 3.10 | 7.09  | 3.79 | 3.11 | 7.12  | 3.80 | 2.30 | 4.51 | 8.72  | 3.76 | 4.58 | 8.91  | 3.81 | 4.51 | 4.53 |

**PI3K↓**

|       |       |      |       |       |      |       |       |      |      |       |      |      |       |      |      |
|-------|-------|------|-------|-------|------|-------|-------|------|------|-------|------|------|-------|------|------|
| -0.80 | -0.78 | 0.08 | -0.87 | -0.82 | 0.07 | -0.84 | -0.78 | 0.04 | 0.09 | -0.83 | 0.06 | 0.07 | -0.83 | 0.04 | 0.04 |
| -0.68 | -0.60 | 0.28 | -0.78 | -0.67 | 0.20 | -0.70 | -0.63 | 0.18 | 0.21 | -0.69 | 0.22 | 0.22 | -0.71 | 0.15 | 0.18 |
| -0.60 | -0.51 | 0.24 | -0.76 | -0.65 | 0.30 | -0.74 | -0.47 | 0.16 | 0.41 | -0.71 | 0.21 | 0.31 | -0.71 | 0.20 | 0.15 |
| -0.70 | -0.63 | 0.20 | -0.80 | -0.71 | 0.19 | -0.76 | -0.62 | 0.12 | 0.24 | -0.75 | 0.16 | 0.20 | -0.75 | 0.13 | 0.13 |

**BAX↑**

|      |      |       |      |      |       |      |      |      |       |      |      |       |      |      |      |
|------|------|-------|------|------|-------|------|------|------|-------|------|------|-------|------|------|------|
| 1.06 | 1.11 | 2.98  | 1.51 | 0.69 | 3.08  | 1.58 | 0.60 | 1.94 | 3.74  | 1.53 | 1.95 | 3.75  | 1.58 | 1.94 | 1.92 |
| 5.23 | 5.36 | 10.70 | 8.04 | 3.60 | 10.85 | 8.26 | 3.34 | 9.70 | 11.43 | 8.13 | 9.70 | 11.44 | 8.28 | 9.73 | 9.60 |
| 2.74 | 2.85 | 7.33  | 1.64 | 2.74 | 7.77  | 1.71 | 2.51 | 2.06 | 11.16 | 1.62 | 2.09 | 11.24 | 1.73 | 2.02 | 2.11 |
| 3.01 | 3.11 | 7.00  | 3.73 | 2.34 | 7.23  | 3.85 | 2.15 | 4.57 | 8.78  | 3.76 | 4.58 | 8.81  | 3.86 | 4.57 | 4.55 |

**PI3K↓ / BAX↑**

|       |       |       |       |       |       |       |       |       |       |       |       |       |       |       |       |
|-------|-------|-------|-------|-------|-------|-------|-------|-------|-------|-------|-------|-------|-------|-------|-------|
| -0.86 | -0.86 | -0.88 | -0.90 | -0.86 | -0.91 | -0.88 | -0.91 | -0.91 | -0.88 | -0.87 | -0.89 | -0.87 | -0.89 | -0.90 | -0.91 |
| -0.65 | -0.65 | -0.75 | -0.68 | -0.60 | -0.82 | -0.66 | -0.76 | -0.75 | -0.72 | -0.63 | -0.73 | -0.69 | -0.70 | -0.80 | -0.76 |
| -0.65 | -0.62 | -0.67 | -0.80 | -0.66 | -0.76 | -0.75 | -0.76 | -0.80 | -0.65 | -0.71 | -0.73 | -0.64 | -0.76 | -0.74 | -0.82 |
| -0.72 | -0.71 | -0.77 | -0.80 | -0.71 | -0.83 | -0.76 | -0.81 | -0.82 | -0.75 | -0.74 | -0.78 | -0.73 | -0.78 | -0.82 | -0.83 |

Module 1 {10}  
Size: 3

Module 2 {17}  
Size: 33

Module 3 {25}  
Size: 2

P↓

C {1}

B↑

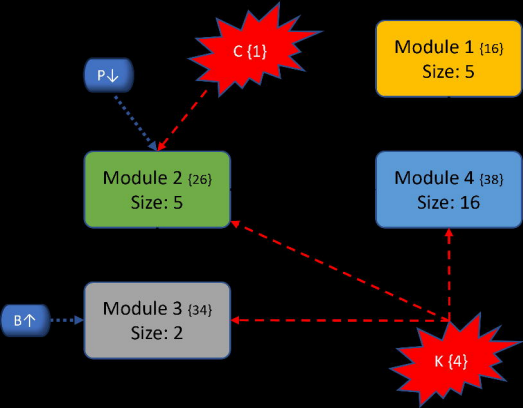

## Modules for C-K Mutation [16,26,34,38]

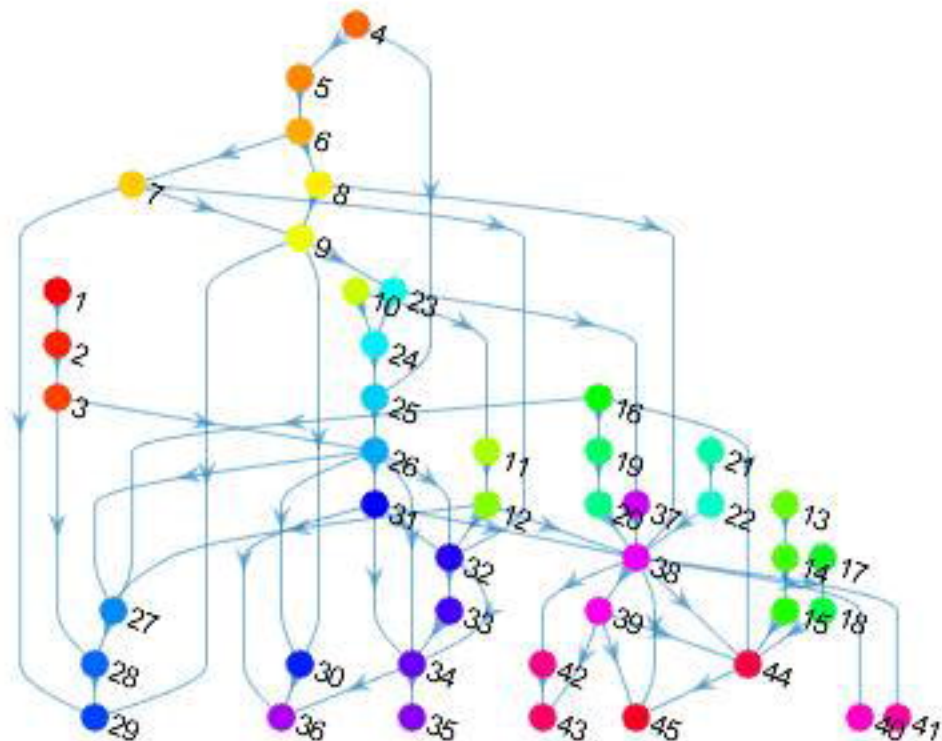

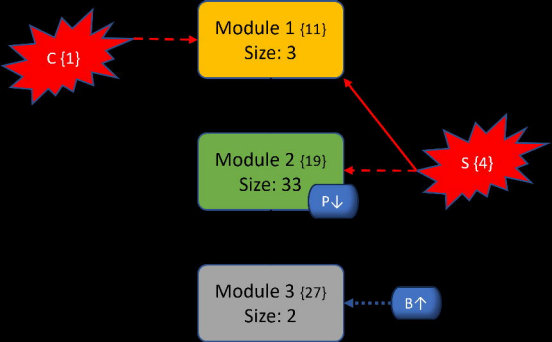

# Modules for C-S Mutation [11,19,27]

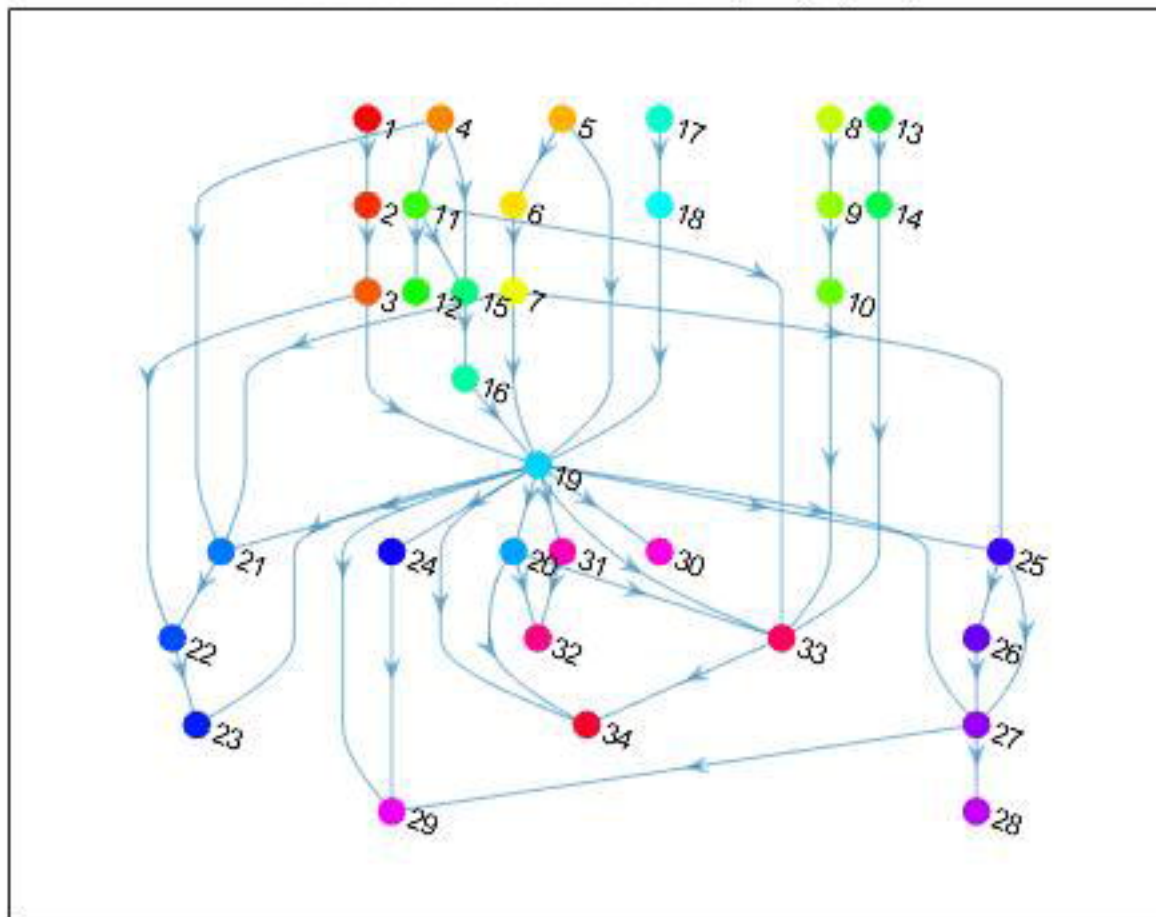

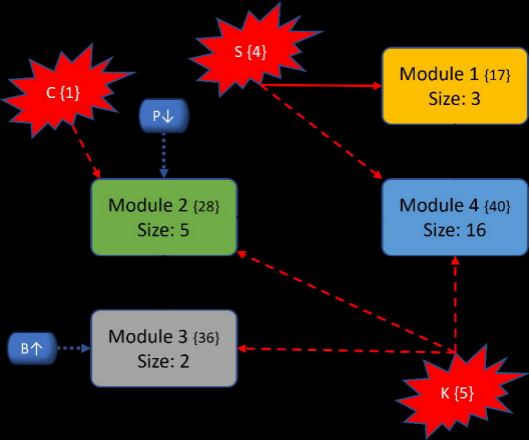



# Modules for C-S-K Mutation [17,28,36,40]

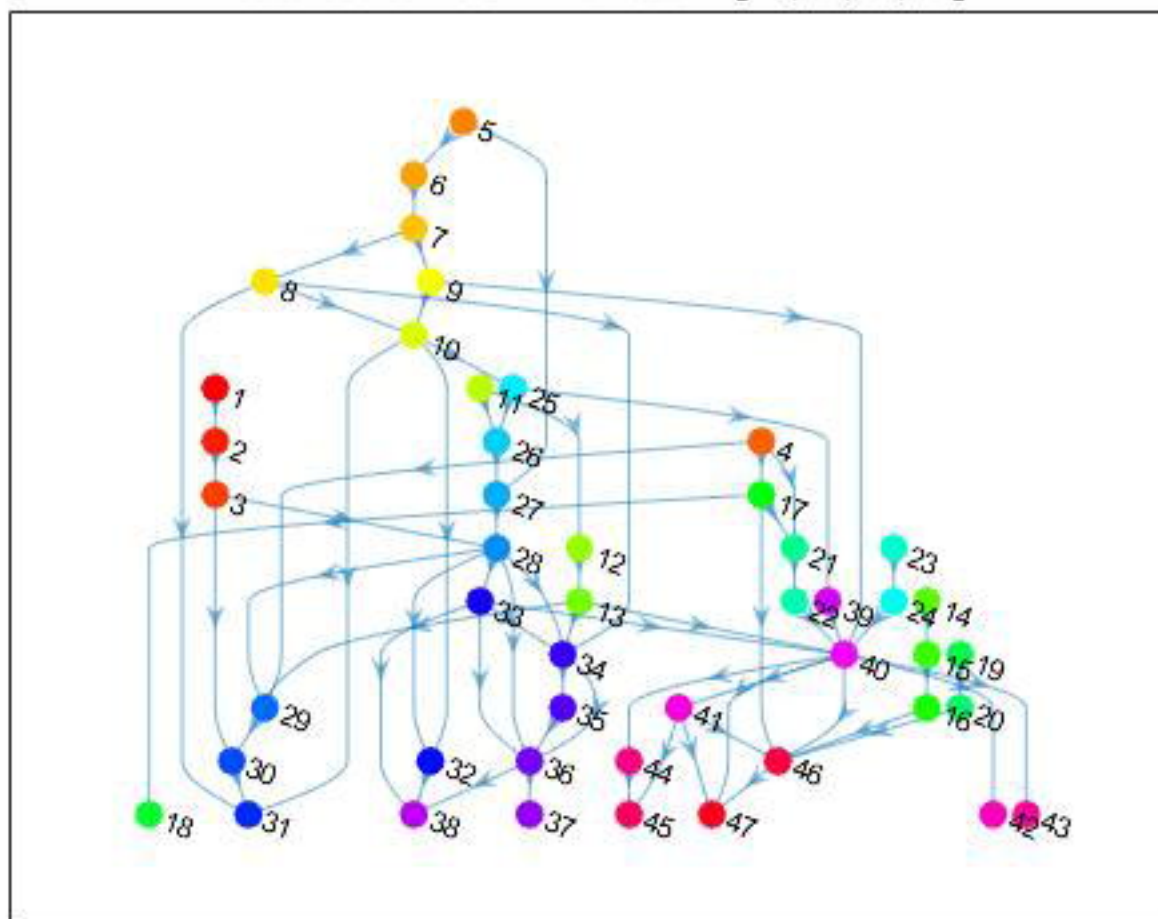

# Modules for CycD Mutation [10,17,25]

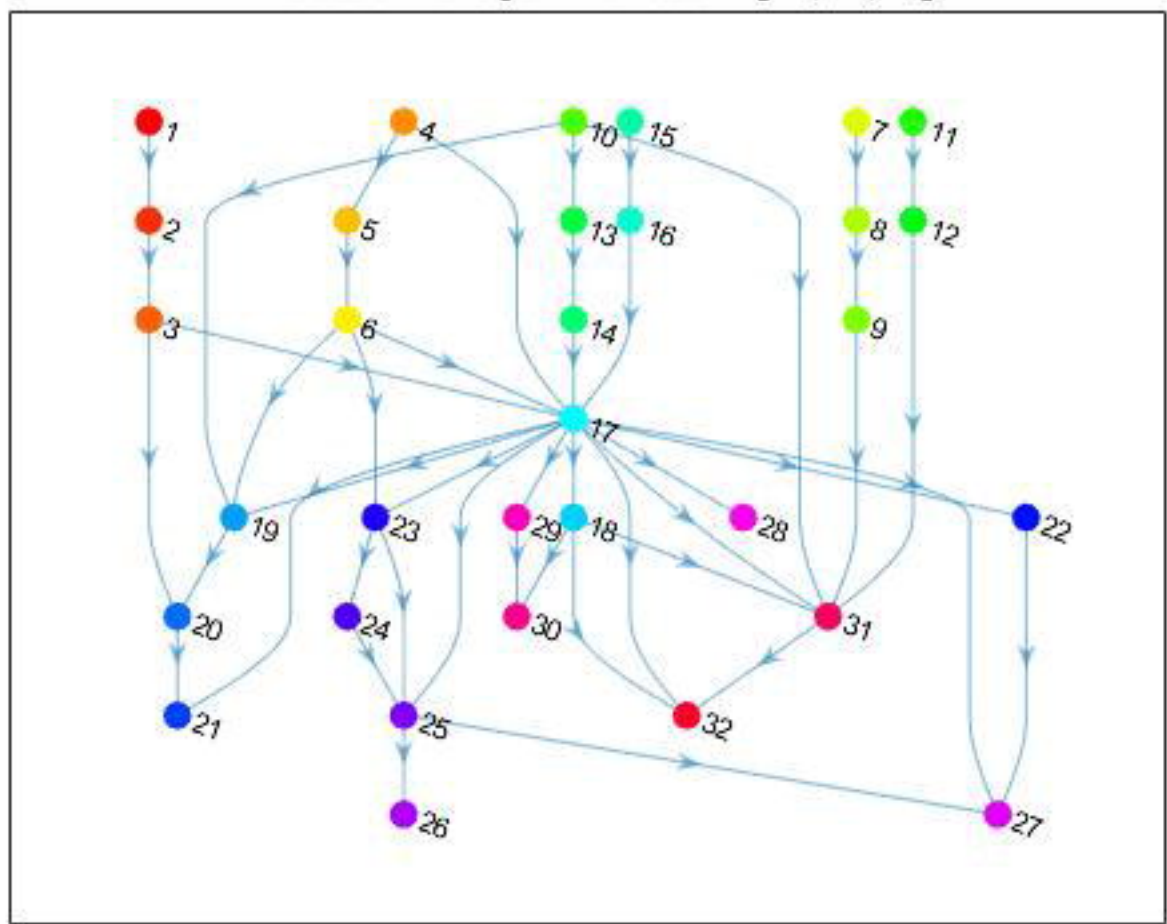

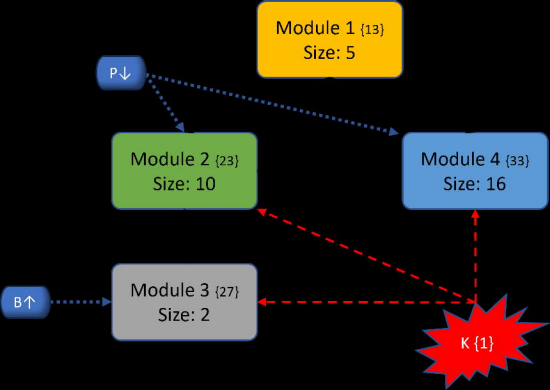

# Modules for KRAS Mutation [13,23,27,33]

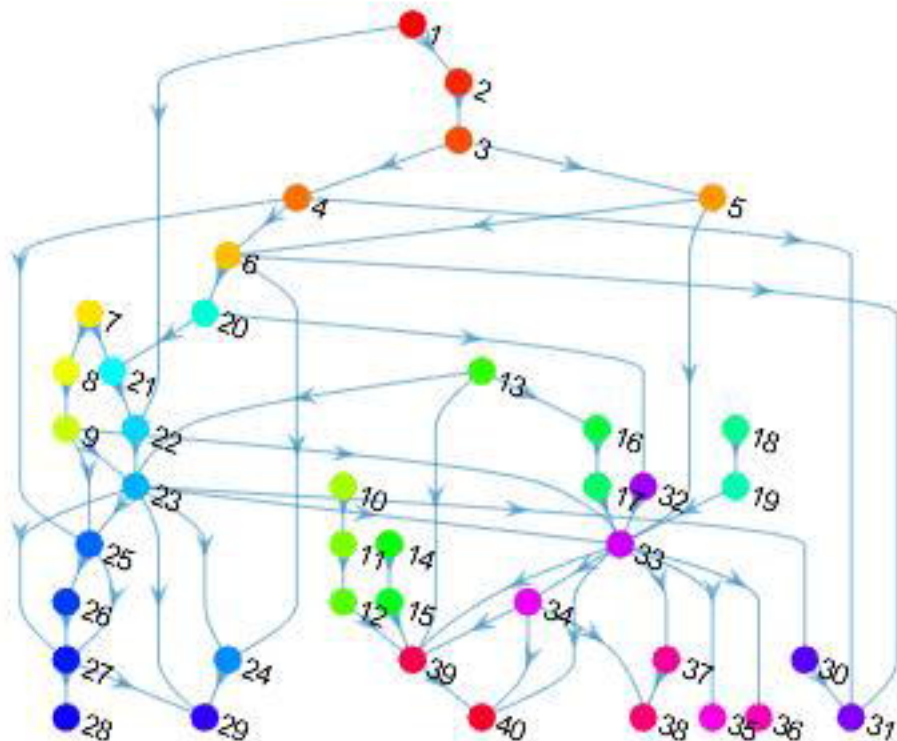

Module 1 {8}  
Size: 3

Module 2 {16}  
Size: 37

Module 3 {21}  
Size: 2

P↓

B↑

S {1}

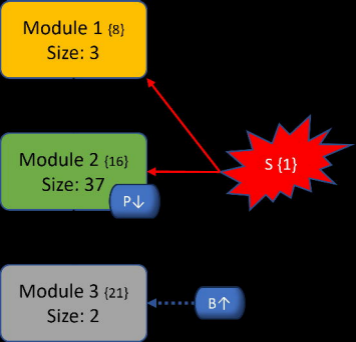

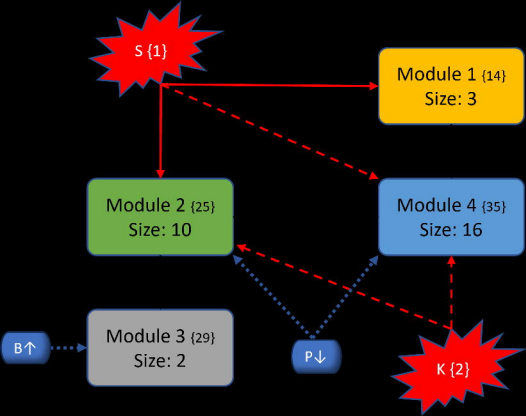

## Modules for S-K Mutation [14,25,29,35]

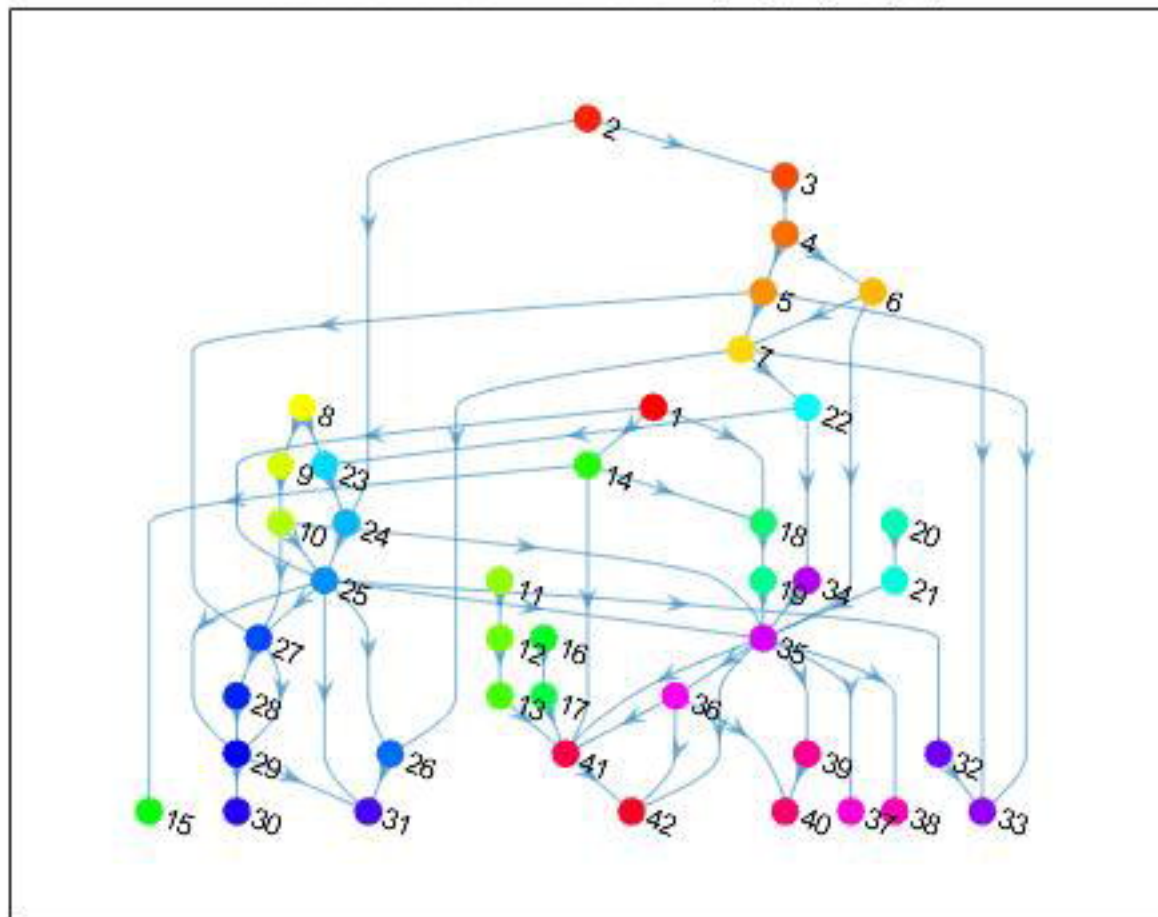



# Modules for SMAD Mutation [8,16,21]

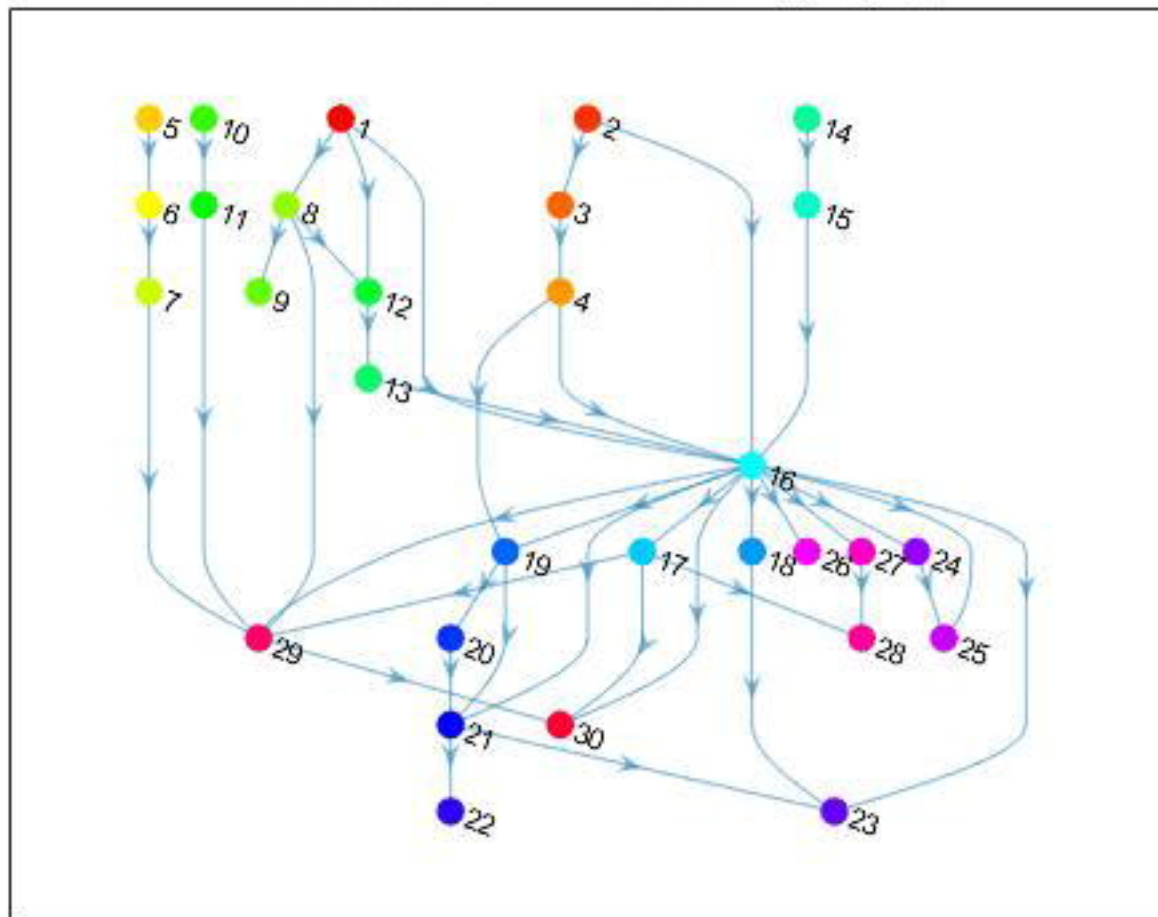

Module 1 {9}  
Size: 5

Module 2 {17}  
Size: 30

Module 3 {22}  
Size: 2

P↓

B↑

T {1}

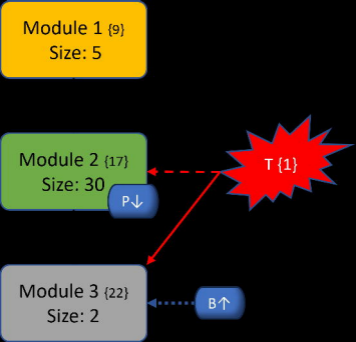

Module 1 {12}  
Size: 5

C {2}

Module 2 {21}  
Size: 30

T {1}

Module 3 {28}  
Size: 2

P↓

B↑

# Modules for T-C Mutation [12,21,28]

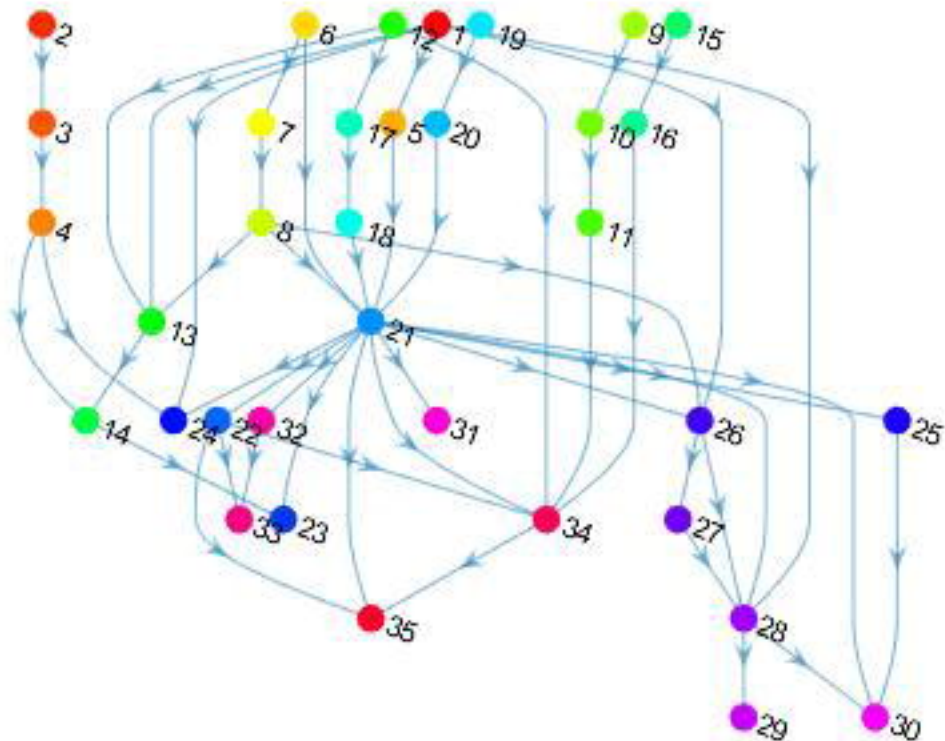

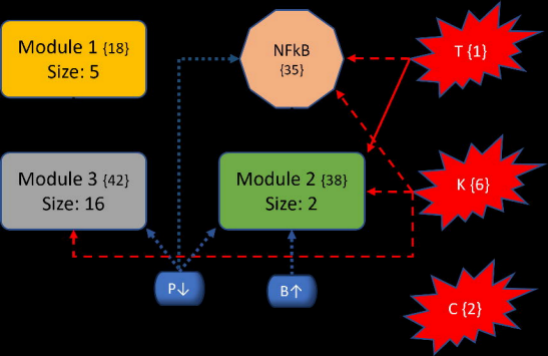

# Modules for T-C-K Mutation [18,38,42]

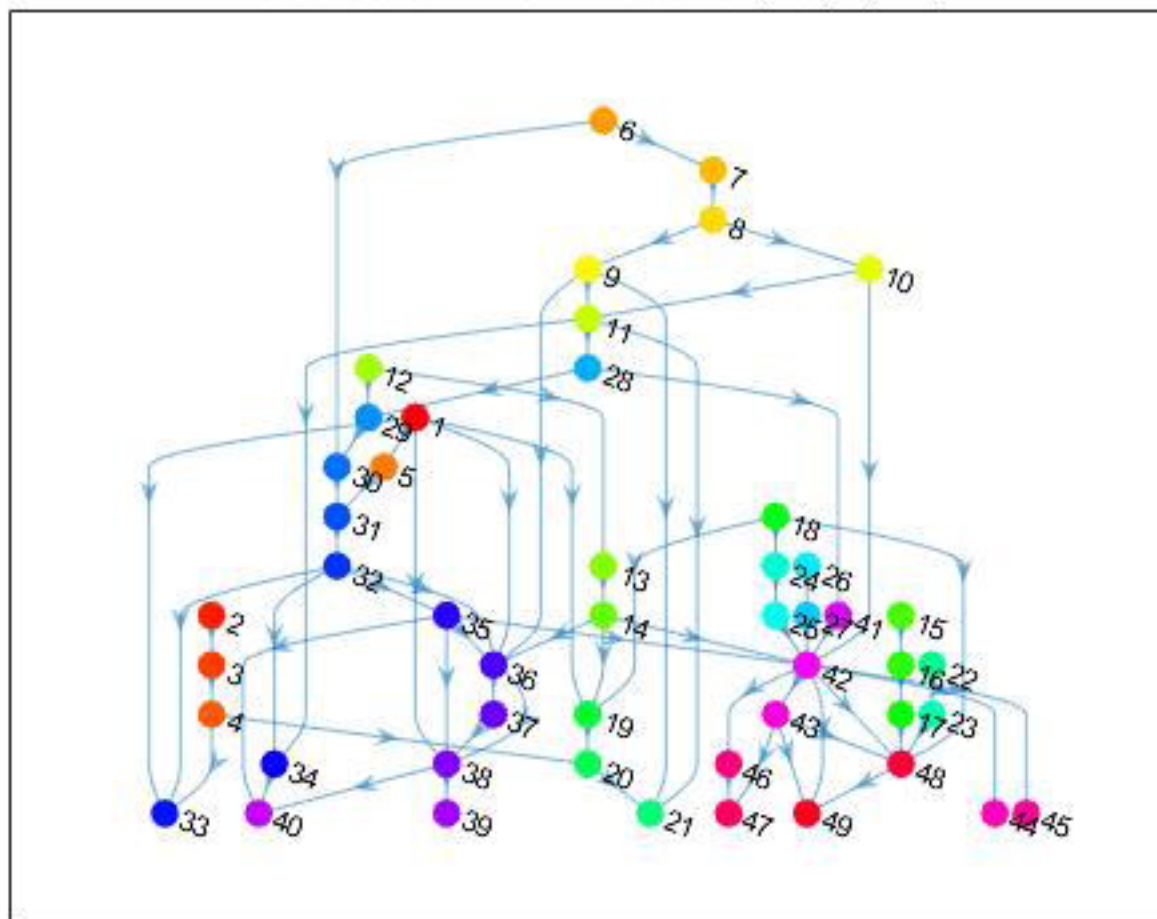

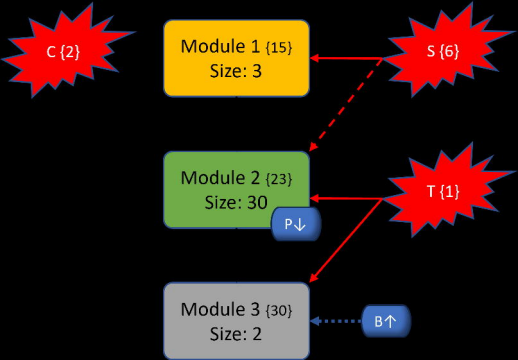

# Modules for T-C-S Mutation [15,23,30]

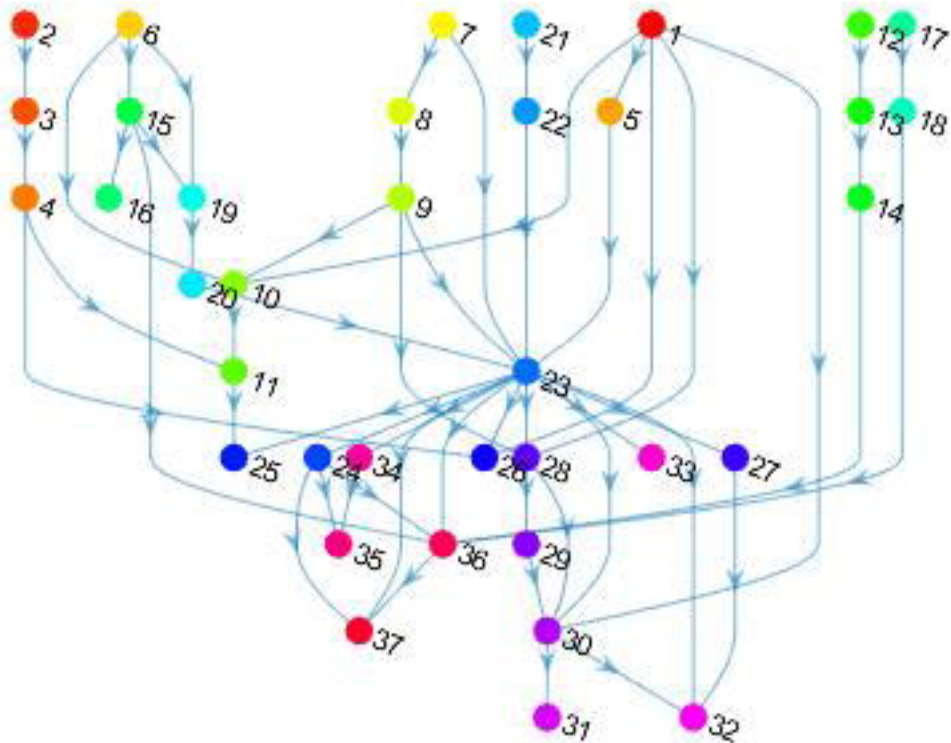



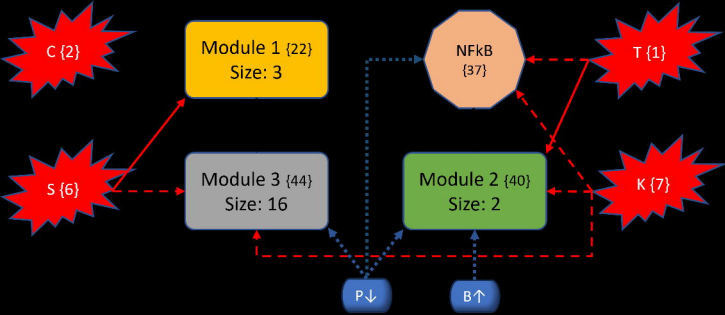

# Modules for T-C-S-K Mutation [22,40,44]

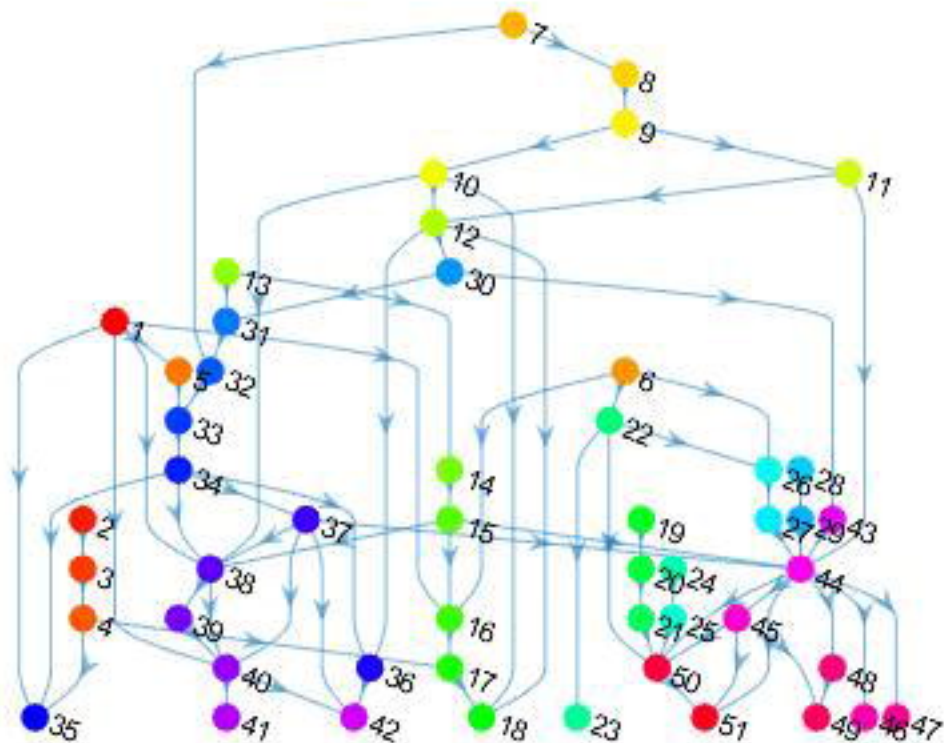

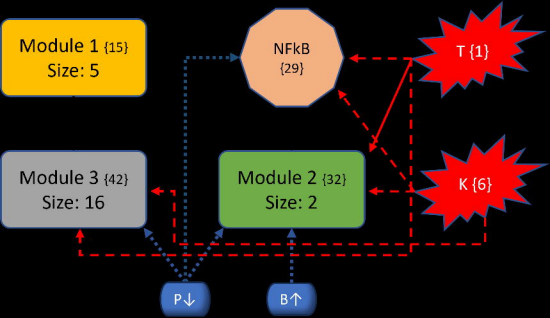

## Modules for T-K Mutation [15,32,42]

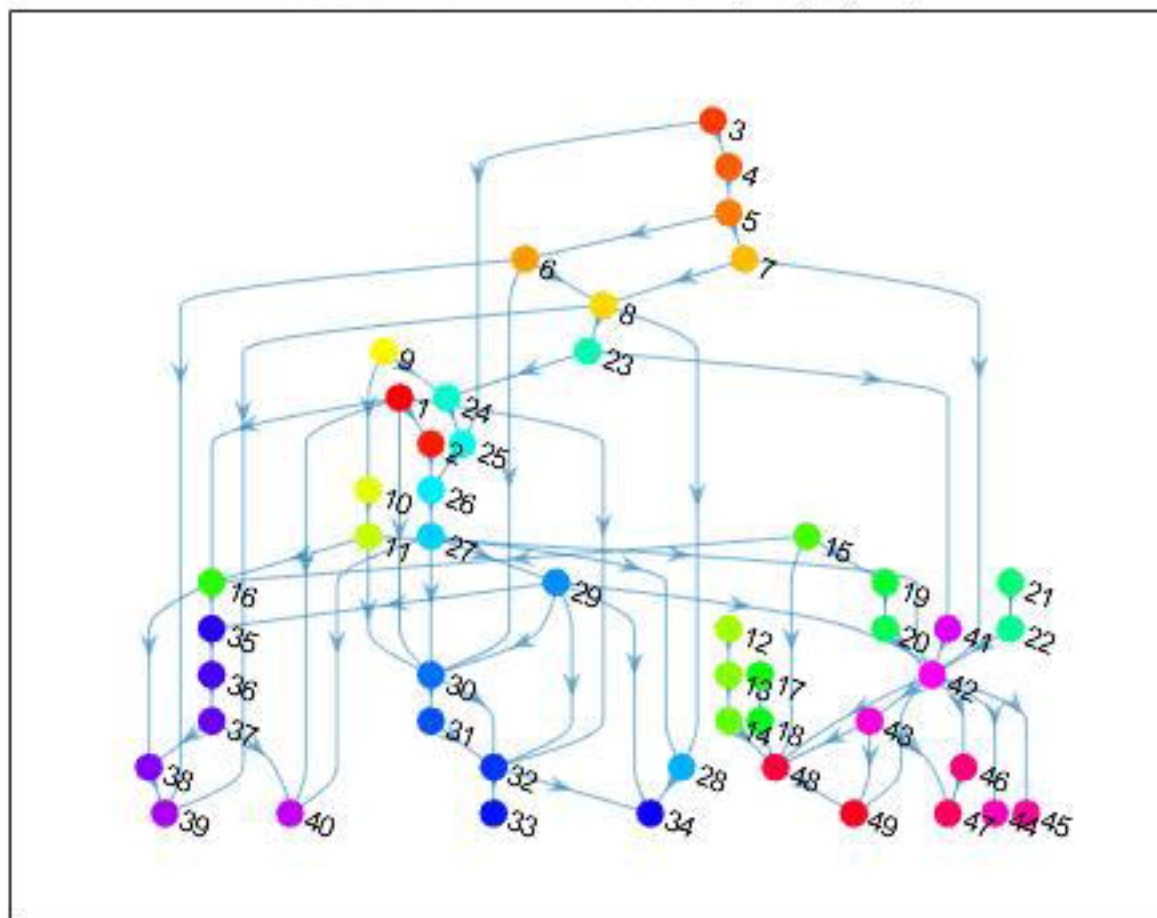

# Modules for TP53 Mutation [9,17,22]

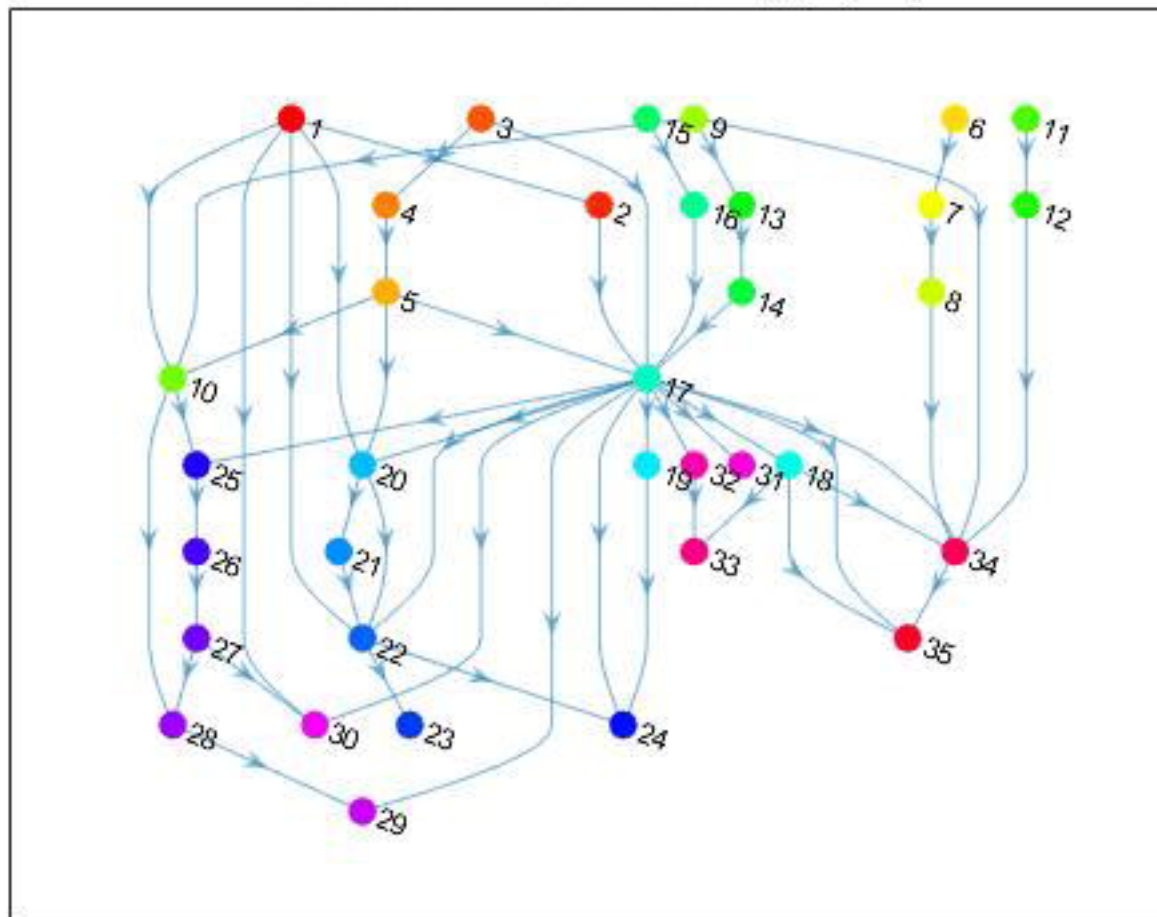

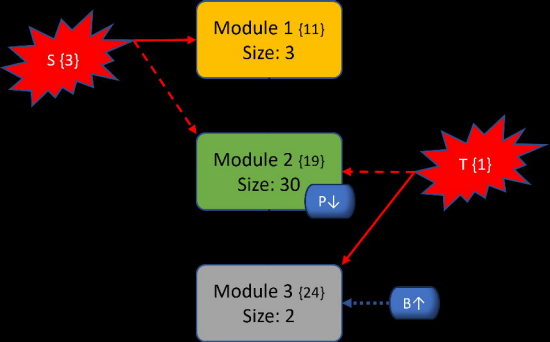

# Modules for T-S Mutation [11,19,24]

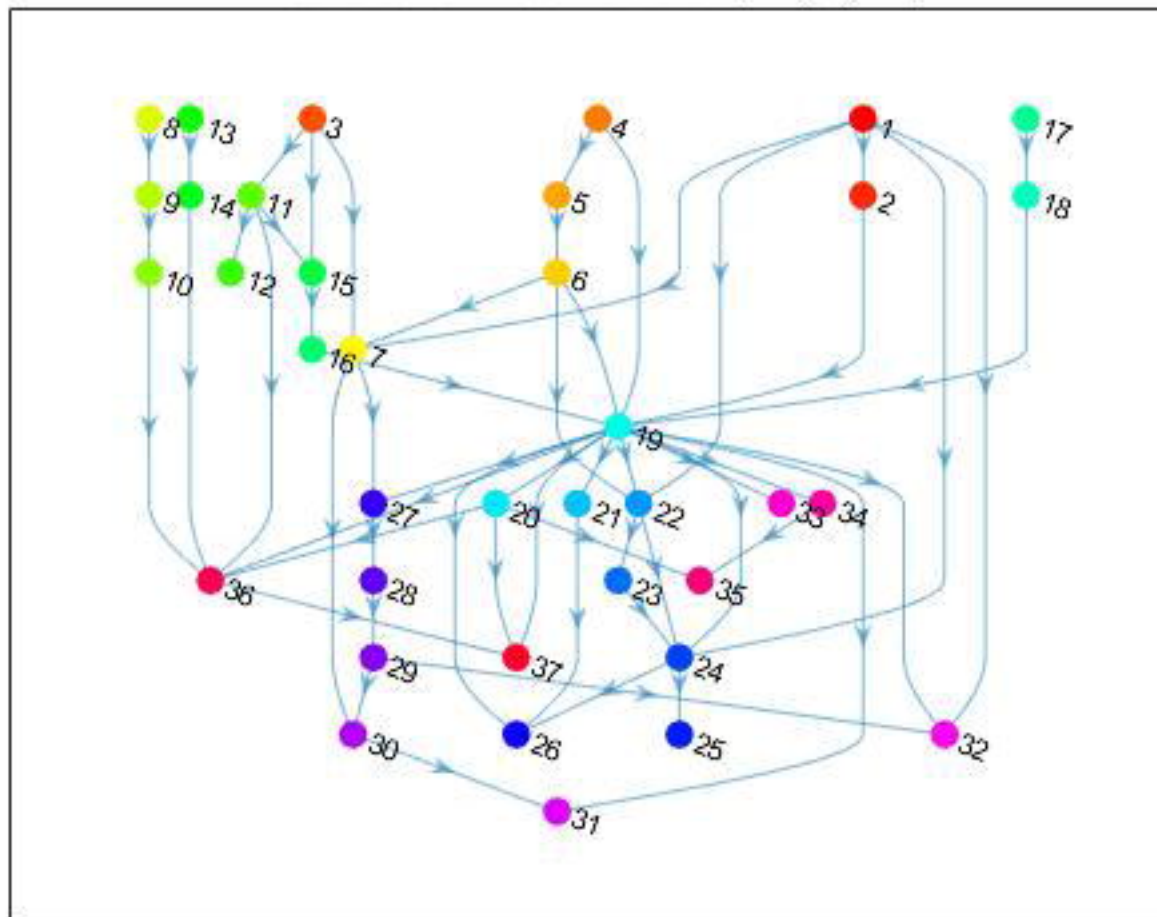

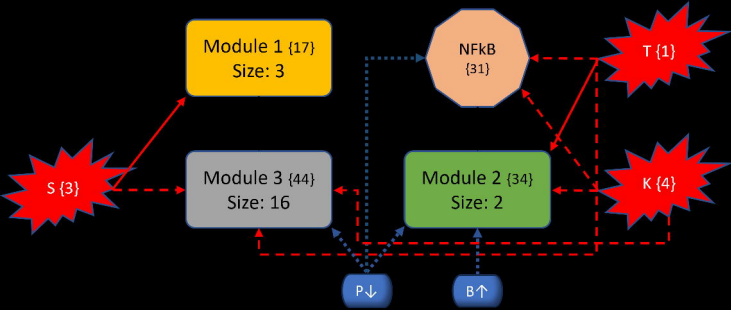



## Modules for T-S-K Mutation [17,34,44]

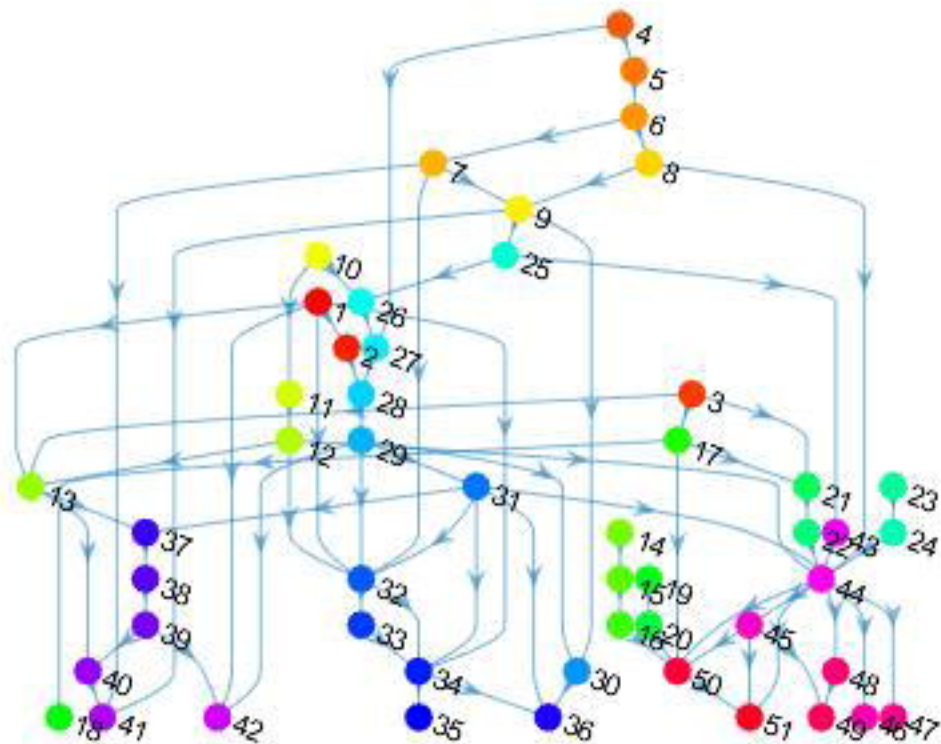

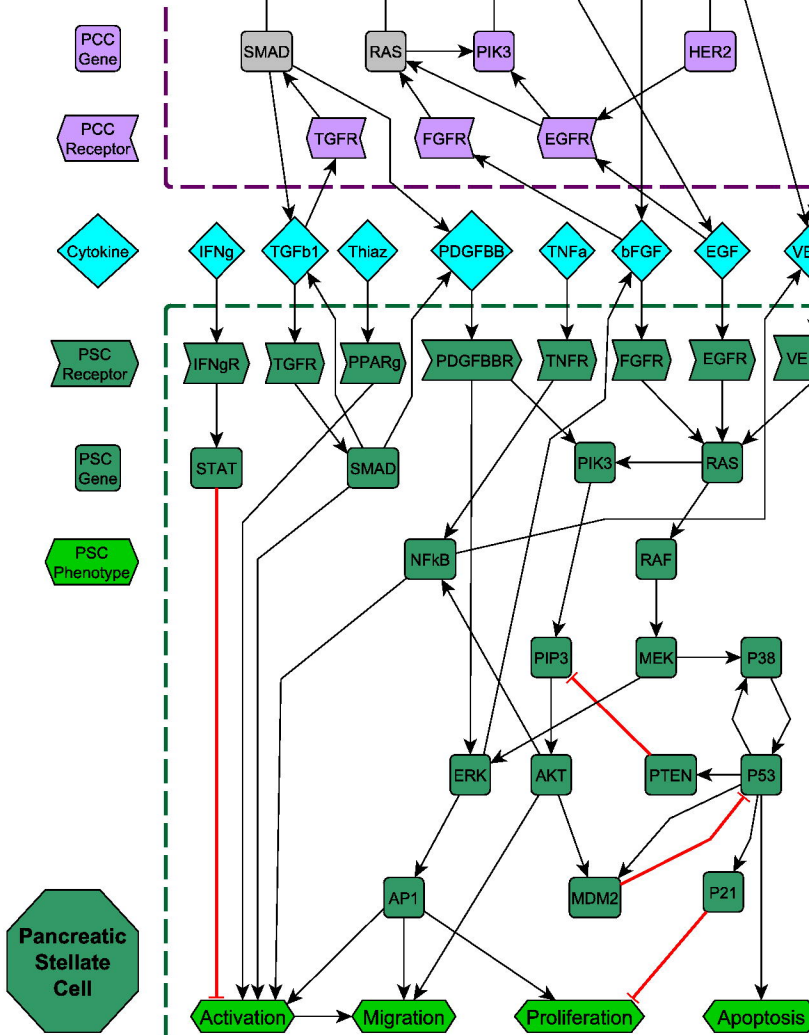

Module 1 {7}  
Size: 5

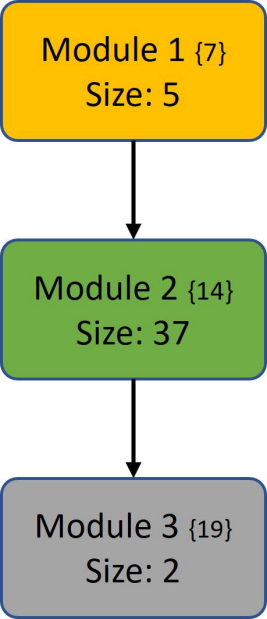

```
graph TD; M1["Module 1 {7}  
Size: 5"] --> M2["Module 2 {14}  
Size: 37"]; M2 --> M3["Module 3 {19}  
Size: 2"];
```

Module 2 {14}  
Size: 37

Module 3 {19}  
Size: 2

# Modules for Wild-Type [7,14,19]

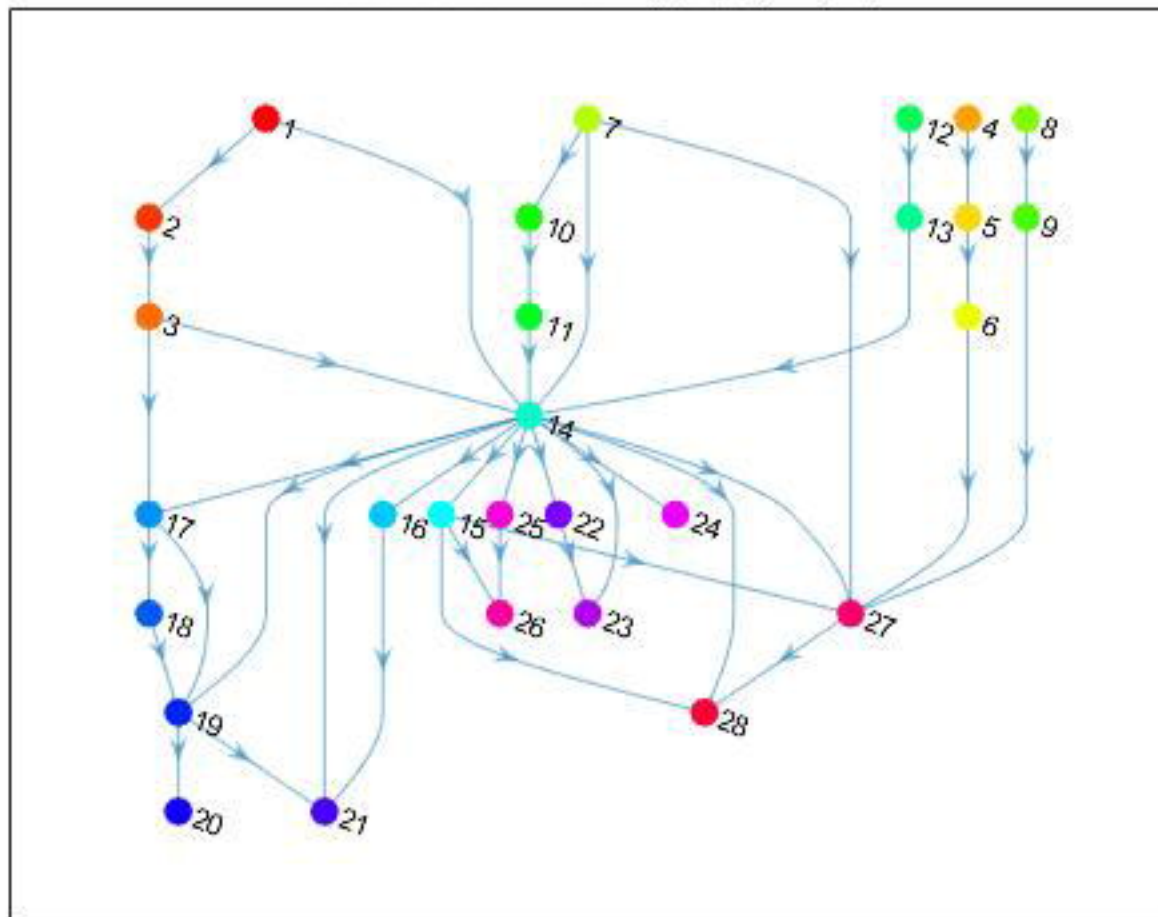

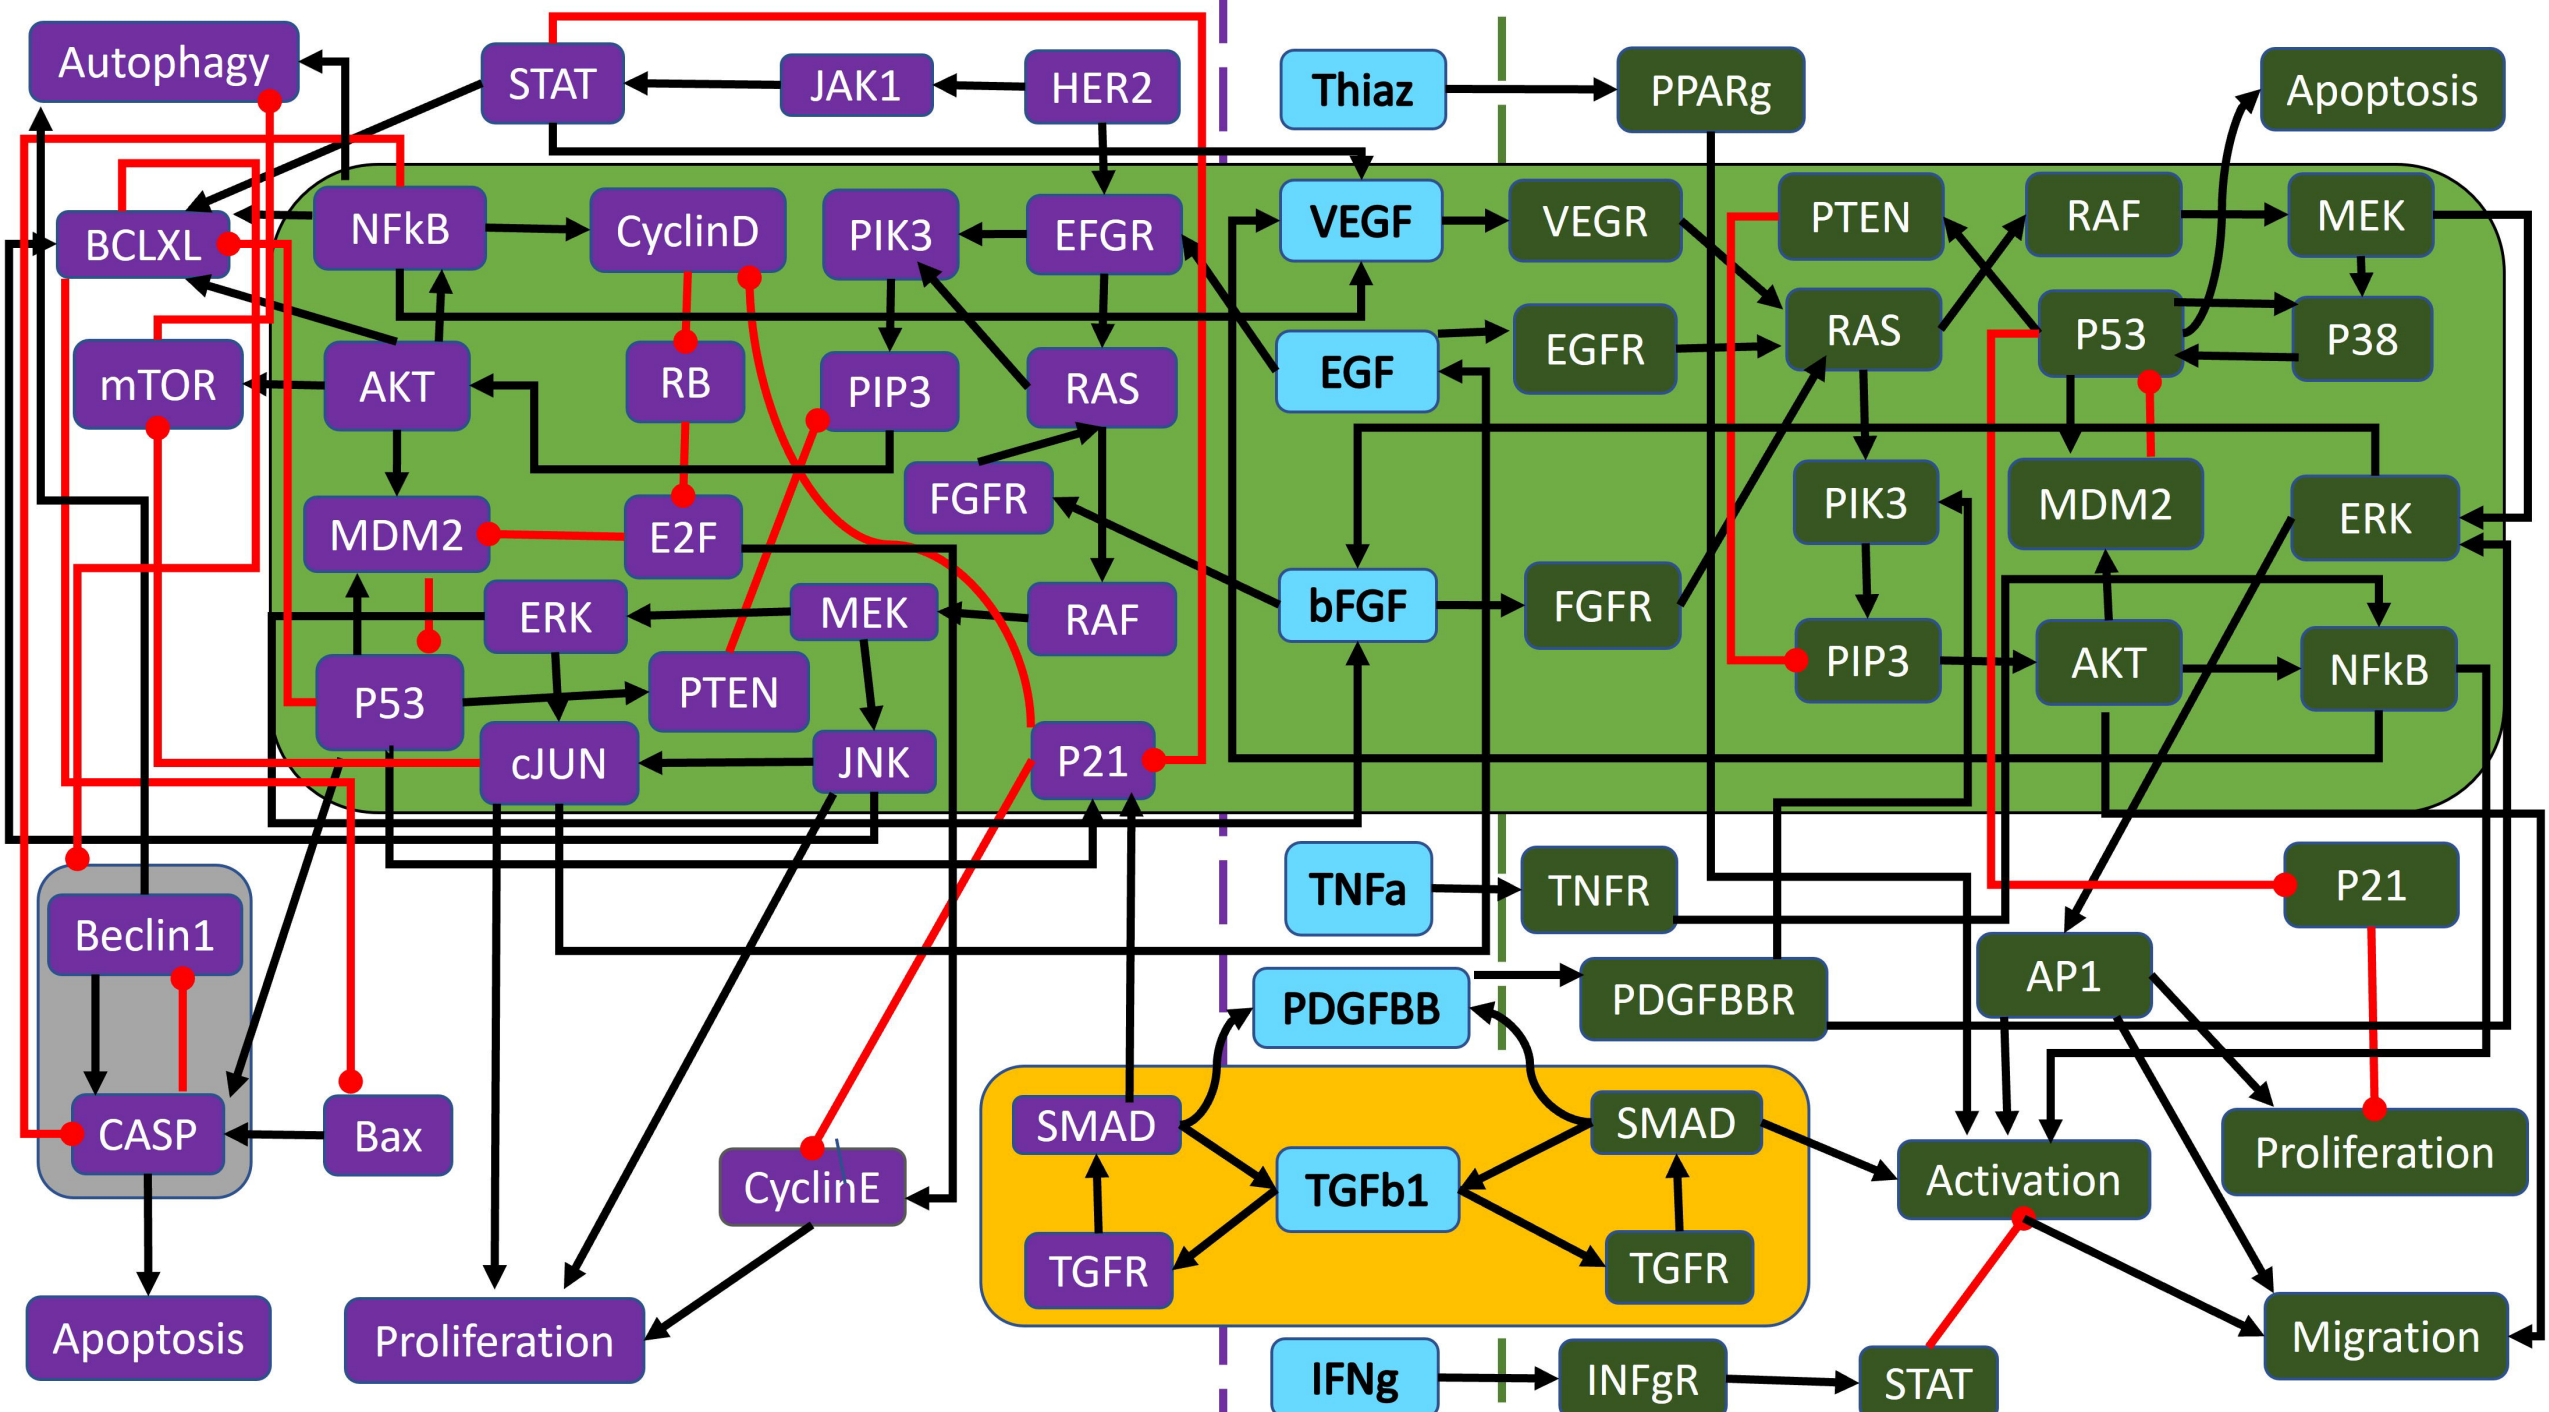

Module 1 {7}  
Size: 5

Module 2 {14}  
Size: 37

P↓

Module 3 {19}  
Size: 2

B↑
